# Supplementary material for: Effects of N-glycosylation on protein conformation and dynamics: Protein Data Bank analysis and molecular dynamics simulation study
Source: PubMed Central journal article supplement (PMC4352867; doi:10.1038/srep08926), 2015-03-09

## **Supplementary Information**

# **Effects of *N*-glycosylation on protein conformation and dynamics: protein data bank analysis and molecular dynamics simulation study**

**Hui Sun Lee, Yifei Qi, and Wonpil Im**

*Department of Molecular Biosciences and Center for Computational Biology,  
The University of Kansas, 2030 Becker Drive Lawrence, Kansas 66047, United States*

**Table S1.** The most redundant glycoproteins in the PDB and six representative proteins (bold) chosen for MD simulation study. The last letter in the PDB names corresponds to the protein chain ID.

| Cluster   | Protein name                                               | # of PDB files | Max. # of sugar residues | PDB of max. # sugars | # protein residues |
|-----------|------------------------------------------------------------|----------------|--------------------------|----------------------|--------------------|
| <b>1</b>  | <b><math>\alpha</math>-Thrombin</b>                        | <b>63</b>      | <b>5</b>                 | <b>1ookB</b>         | <b>232</b>         |
| 2         | Plant Acetylcholinesterase                                 | 50             | 2                        | 1dx6A                | 532                |
| 3         | $\alpha$ -mannosidase II                                   | 36             | 1                        | 1htyA                | 1014               |
| <b>4</b>  | <b>Lactoferrin</b>                                         | <b>36</b>      | <b>6</b>                 | <b>1sdxA</b>         | <b>335</b>         |
| <b>5</b>  | <b>CD1D antigen</b>                                        | <b>34</b>      | <b>6</b>                 | <b>3gmlA</b>         | <b>275</b>         |
| 6         | Renin                                                      | 31             | 2                        | 3gw5A                | 337                |
| 7         | Lactoperoxidase                                            | 29             | 3                        | 2gj1A                | 580                |
| 8         | Human dipeptidyl peptidase IV (1)                          | 22             | 4                        | 2ripA                | 729                |
| 9         | Mouse Acetylcholinesterase                                 | 22             | 2                        | 1j06A                | 542                |
| 10        | Ribosome inactivating protein                              | 22             | 2                        | 3mrwA                | 246                |
| 11        | Glutamate carboxypeptidase                                 | 21             | 4                        | 2c6cA                | 694                |
| 12        | Acid- $\beta$ -glucosidase                                 | 19             | 5                        | 2j25B                | 497                |
| 13        | Integrin $\beta$ -3                                        | 19             | 7                        | 2vdkB                | 461                |
| 14        | ANCE                                                       | 16             | 6                        | 2x8yA                | 595                |
| 15        | $\alpha$ -amylase                                          | 16             | 1                        | 1bsiA                | 496                |
| 16        | Human Dipeptidyl peptidase IV (2)                          | 15             | 2                        | 1x70B                | 728                |
| 17        | Influenze virus hemagglutinin                              | 14             | 2                        | 2ypgB                | 173                |
| <b>18</b> | <b>Immunoglobulin <math>\gamma</math>-1 heavy chain</b>    | <b>11</b>      | <b>10</b>                | <b>1l6xA</b>         | <b>207</b>         |
| 19        | Butyryl cholinesterase                                     | 11             | 3                        | 1p0iA                | 526                |
| 20        | H-2 class I histocompatibility antigen, K-B $\alpha$ chain | 10             | 3                        | 1g7pA                | 274                |
| <b>21</b> | <b>Myeloperoxidase isoform C</b>                           | <b>10</b>      | <b>6</b>                 | <b>1cxpC</b>         | <b>466</b>         |
| 22        | Maltase-glucoamylase                                       | 10             | 2                        | 2qlyA                | 568                |
| 23        | Integrin $\alpha$ -IIB                                     | 10             | 2                        | 3fcsC                | 959                |
| <b>24</b> | <b>Antithrombin</b>                                        | <b>10</b>      | <b>5</b>                 | <b>1e04L</b>         | <b>389</b>         |
| 25        | Bovine rhodopsin                                           | 10             | 4                        | 1hzxB                | 326                |

**Table S2.** MD simulation system information.

| System name | Glycan | # water | # ions                                 | # total atoms |
|-------------|--------|---------|----------------------------------------|---------------|
| 1cxpC       | w/     | 25,234  | 63 K <sup>+</sup> , 80 Cl <sup>-</sup> | 83,512        |
|             | w/o    | 25,292  | 63 K <sup>+</sup> , 80 Cl <sup>-</sup> | 83,495        |
| 1l6xA       | w/     | 23,116  | 67 K <sup>+</sup> , 67 Cl <sup>-</sup> | 73,012        |
|             | w/o    | 23,165  | 67 K <sup>+</sup> , 67 Cl <sup>-</sup> | 72,926        |
| 1e04L       | w/     | 23,754  | 70 K <sup>+</sup> , 66 Cl <sup>-</sup> | 77,865        |
|             | w/o    | 23,835  | 70 K <sup>+</sup> , 66 Cl <sup>-</sup> | 77,883        |
| 1ookB       | w/     | 13,940  | 37 K <sup>+</sup> , 42 Cl <sup>-</sup> | 46,187        |
|             | w/o    | 11,737  | 31 K <sup>+</sup> , 36 Cl <sup>-</sup> | 39,449        |
| 1sdxA       | w/     | 17,962  | 51 K <sup>+</sup> , 52 Cl <sup>-</sup> | 59,316        |
|             | w/o    | 18,854  | 54 K <sup>+</sup> , 55 Cl <sup>-</sup> | 61,731        |
| 3gmlA       | w/     | 26,190  | 77 K <sup>+</sup> , 73 Cl <sup>-</sup> | 83,321        |
|             | w/o    | 26,318  | 77 K <sup>+</sup> , 73 Cl <sup>-</sup> | 83,424        |

**Table S3.** Glycosylation site information and RMSF differences at the glycosylation site.  $\Delta\text{RMSF}_i = \text{RMSF}_{i,P} - \text{RMSF}_{i,GP}$ , where  $i$  is for the glycosylated site, GP for glycosylated protein, and P for deglycosylated protein. The average  $\Delta\text{RMSF}$  is the average of  $\Delta\text{RMSF}_i$  over all the residues in a protein.  $\Delta\text{RMSF}_i$  is the average of the three independent replicates. The standard errors are omitted for clarity.

| PDB   | # of glycans | Glycosylation site | # of sugar residues | Location of glycosylation site | $\Delta\text{RMSF}_i$ | Avg. $\Delta\text{RMSF}$ |
|-------|--------------|--------------------|---------------------|--------------------------------|-----------------------|--------------------------|
| 1cxpC | 3            | Asn-189            | 1                   | Loop                           | 0.05                  | 0.15                     |
|       |              | Asn-225            | 1                   | Loop                           | 0.13                  |                          |
|       |              | Asn-317            | 6                   | Loop                           | 0.16                  |                          |
| 1e04L | 3            | Asn-96             | 2                   | Loop                           | 0.34                  | 0.01                     |
|       |              | Asn-155            | 2                   | Loop                           | -0.01                 |                          |
|       |              | Asn-192            | 5                   | $\alpha$ -helix                | -0.02                 |                          |
| 1l6xA | 1            | Asn-297            | 10                  | Loop                           | 0.22                  | 0.10                     |
| 1ookB | 1            | Asn-60             | 5                   | Loop                           | 0.08                  | 0.17                     |
|       |              | Asn-368            | 2                   | Loop                           | 0.26                  |                          |
|       |              | Asn-476            | 3                   | $\alpha$ -helix                | 0.21                  |                          |
| 1sdxA | 3            | Asn-545            | 6                   | $\alpha$ -helix terminal       | 0.08                  | 0.12                     |
|       |              | Asn-20             | 1                   | $\beta$ -sheet terminal        | 0.44                  |                          |
|       |              | Asn-42             | 5                   | Loop                           | -0.22                 |                          |
| 3gmlA | 3            | Asn-165            | 6                   | $\alpha$ -helix                | 0.50                  | 0.02                     |

**Table S4.** Average van der Waals ( $E_{\text{vdW}}$ ) and electrostatic ( $E_{\text{elec}}$ ) energies between the protein and the glycans during the last 50-ns simulations. The average is over the three independent replicates with the standard errors. These values should be considered carefully as  $E_{\text{vdW}}$  becomes negatively larger when the number of sugar units in glycans increases as well as  $E_{\text{elec}}$  is given without consideration of electrostatic solvation contributions. Nonetheless, these numbers are provided here to illustrate that there are favorable interactions between the protein and the glycan components.

| System | $E_{\text{vdW}}$  | $E_{\text{elec}}$   | $E_{\text{vdW}} + E_{\text{elec}}$ |
|--------|-------------------|---------------------|------------------------------------|
| 1cxpC  | $-33.38 \pm 0.67$ | $-89.69 \pm 8.78$   | $-123.17 \pm 9.15$                 |
| 1e04L  | $-21.30 \pm 0.42$ | $-87.26 \pm 1.67$   | $-108.56 \pm 1.24$                 |
| 1l6xA  | $-35.86 \pm 7.21$ | $-103.22 \pm 14.20$ | $-139.08 \pm 20.16$                |
| 1ookB  | $-7.67 \pm 1.23$  | $-41.86 \pm 4.98$   | $-49.53 \pm 5.79$                  |
| 1sdxA  | $-42.92 \pm 1.85$ | $-143.22 \pm 7.86$  | $-186.14 \pm 9.37$                 |
| 3gmlA  | $-38.71 \pm 2.26$ | $-96.73 \pm 2.08$   | $-135.44 \pm 2.78$                 |

**Figure S1.** Two representative examples of the GP/P pairs having an RMSD of  $\sim 1.5$  Å:  
(A) H-2 class I histocompatibility antigen, K-B  $\alpha$  chain and (B) Triacylglycerol lipase.  
The glycosylated and deglycosylated proteins are colored in green and blue, respectively.

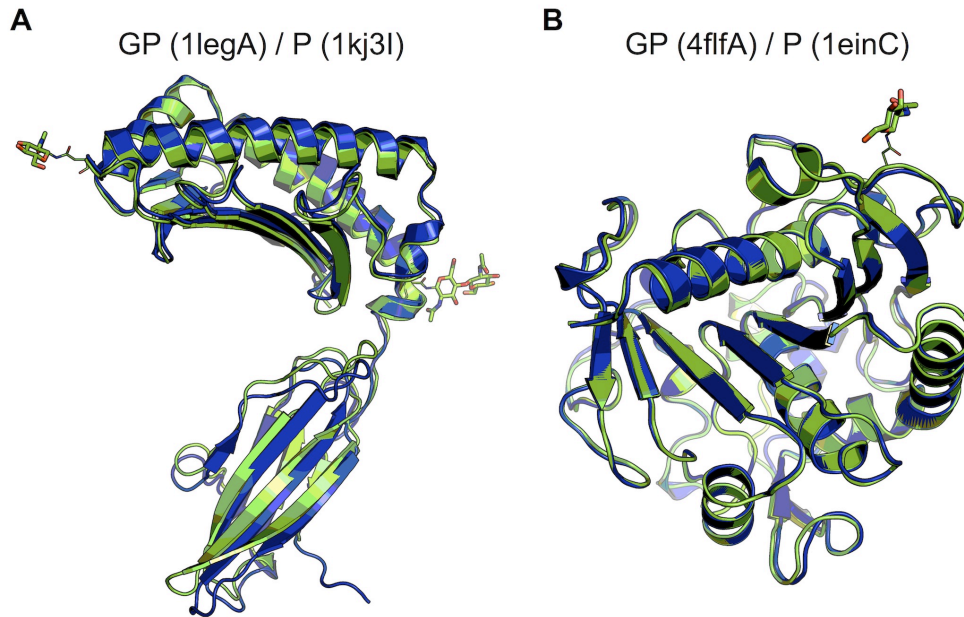



**Figure S3.** The crystal structure of 1ookB and the RMSF plots of the glycosylated (GP, blue) and deglycosylated (P, red) forms. In this *N*-glycoprotein, the glycan is attached at Asn-60. The three residues showing the largest RMSF differences upon glycosylation (residues 165–167) are colored in red in the glycoprotein structure.

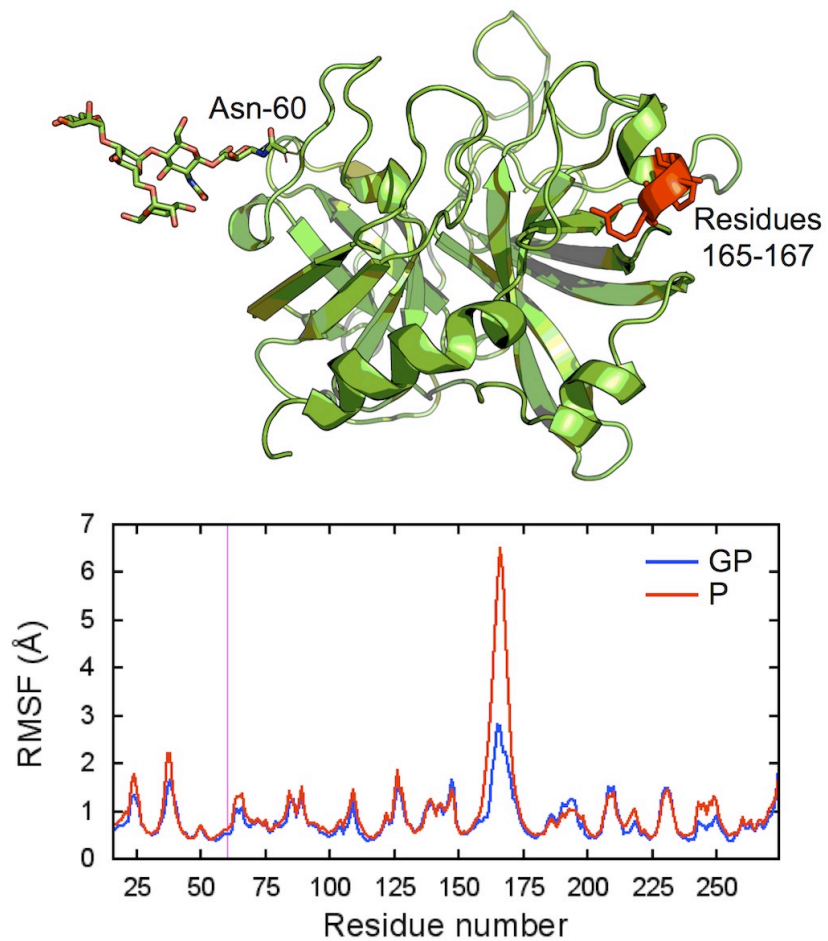



**Figure S4.** The crystal structure of ribonuclease B (1rbbA) and the RMSF plots of glycosylated (GP, blue) and deglycosylated (P, red) forms from the last 50-ns trajectories. The profile is the average of three independent replicates. The errors bars are not displayed for clarity. The magenta line in the plot corresponds to the glycosylation site.

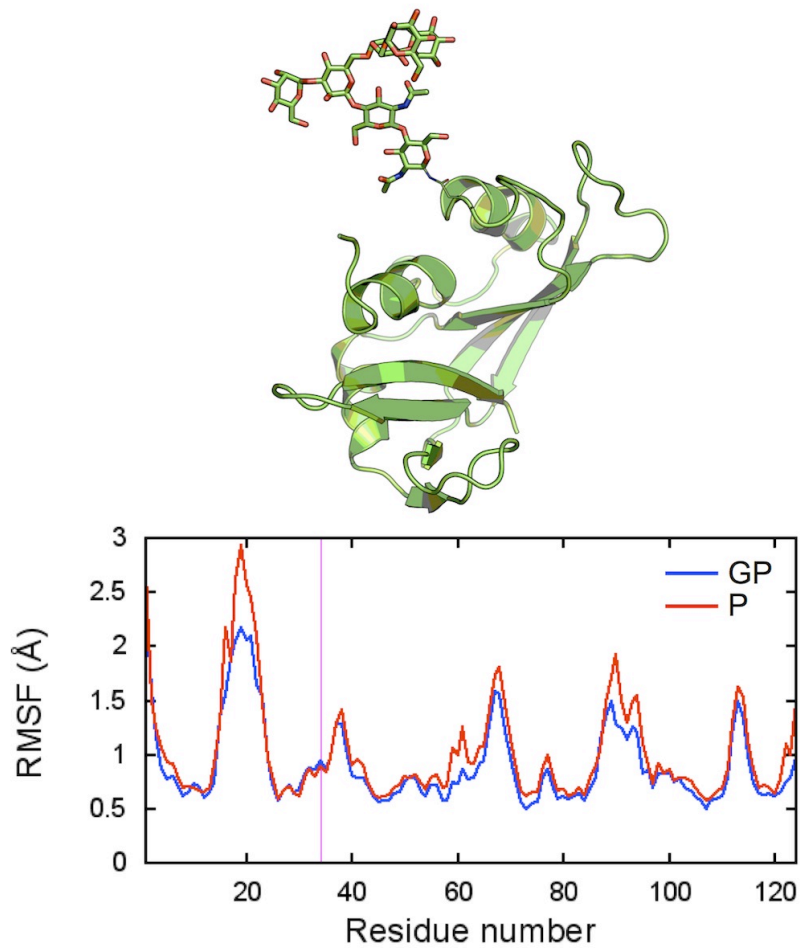

**Figure S5.** Characterization of hydrogen bonds (HBs) between protein and glycan components in the crystal structures of benchmark *N*-glycoproteins for MD simulations.

Four out of six proteins have protein-glycan HBs.

**1cxpC (6 HBs)**

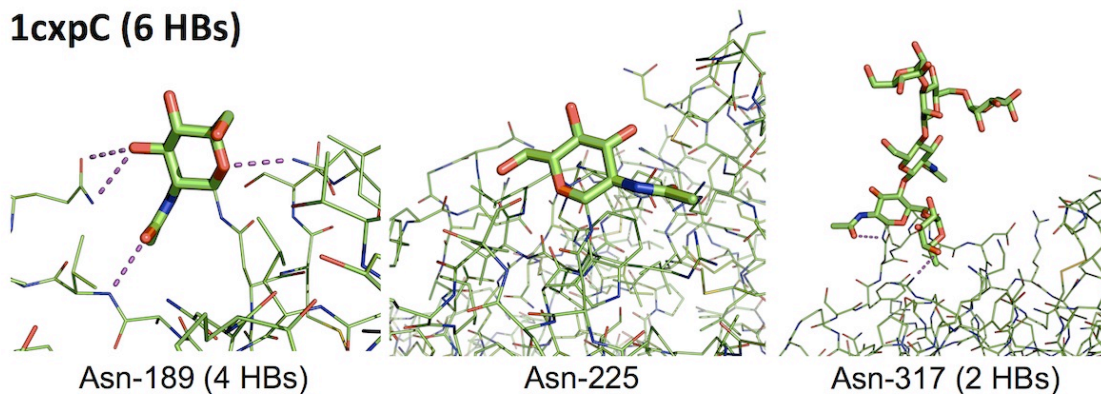

**1l6xA (8 HBs)**

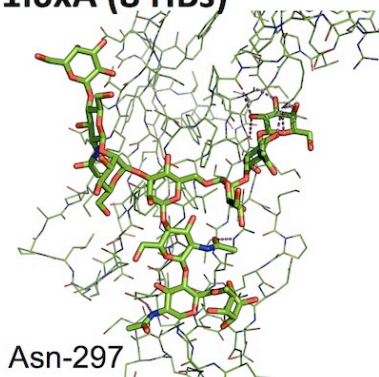

**3gmlA (7 HBs)**

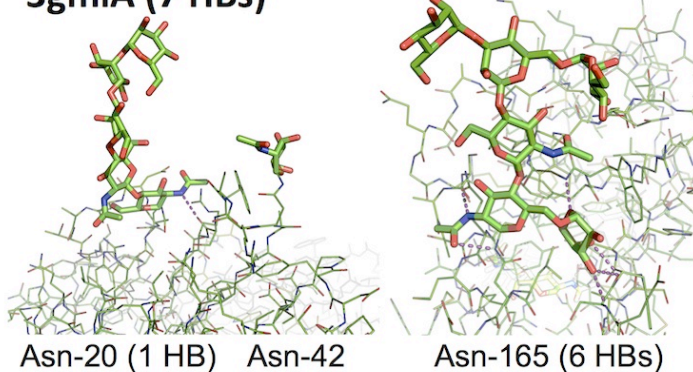

**1sdxA (8 HBs)**

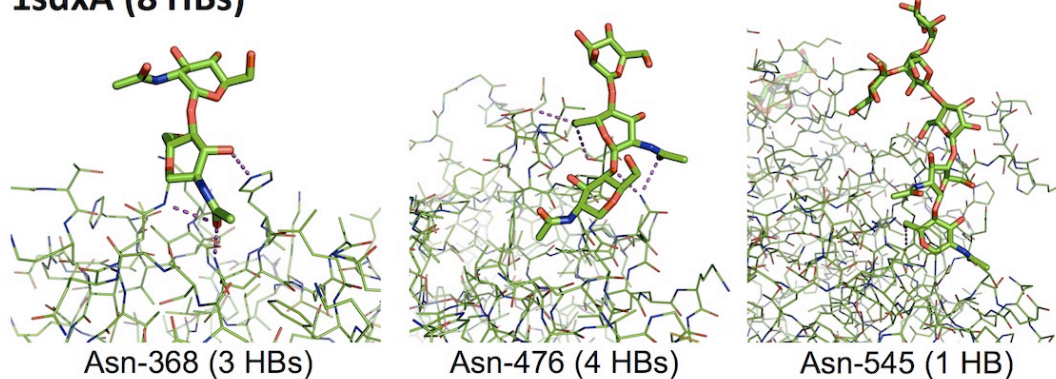

**Figure S6.** Large conformational changes in 3gmlA during MD simulations. The RMSD time-series calculated for (A) the whole protein and (B) a domain containing glycans (residues 7–184). In the plots, GP (blue) and P (red) represent the glycosylated and deglycosylated forms of the protein, respectively. (C) Structural comparison of the initial structure with a snapshot at 100 ns.

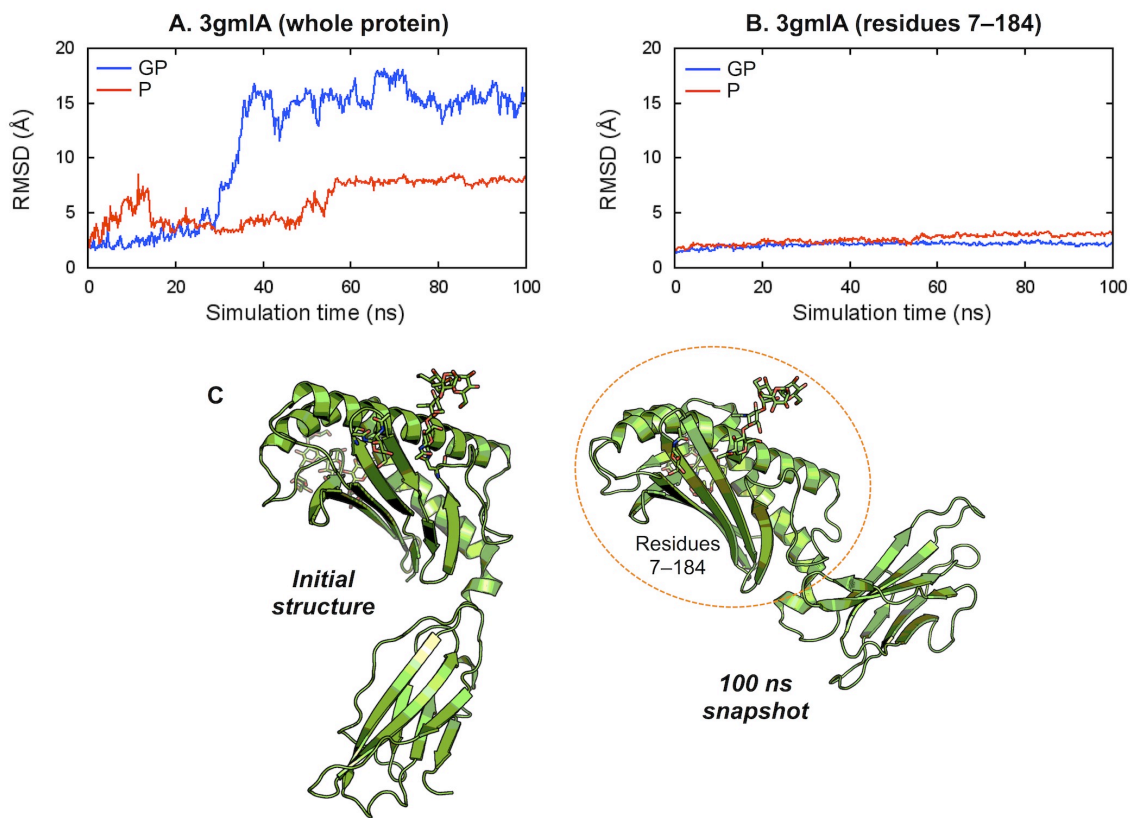

Supplement: srep08926-s1.pdf [file srep08926-s1.pdf]
